# Supplementary material for: One-pot hydrothermal synthesis of TiO2/graphene nanocomposites for enhanced visible light photocatalysis and photovoltaics
Source: Royal Society of Chemistry journal article supplement (doi:10.1039/c3ra41388h), 2013-01-01
Supplement: c3ra41388h.pdf [file c3ra41388h.pdf]

# Electronic Supplementary Information

## **One-pot hydrothermal synthesis of TiO<sub>2</sub>/graphene nanocomposites for enhanced visible photocatalysis and photovoltaics**

**GS Anjusree, A. Sreekumaran Nair, Shantikumar V Nair and Sajini Vadukumpully\***

Nanosolar Division, Amrita Centre for Nanosciences and Molecular Medicine, Ponekkara,  
Kochi, India – 682041

E-mail: [sajini@aims.amrita.edu](mailto:sajini@aims.amrita.edu)

Fax: +91-484-2802020; Tel: +91-484-2802020

**Fig S1** The plot showing the band gap shift in TGC-10 compared to the bare TiO<sub>2</sub>.

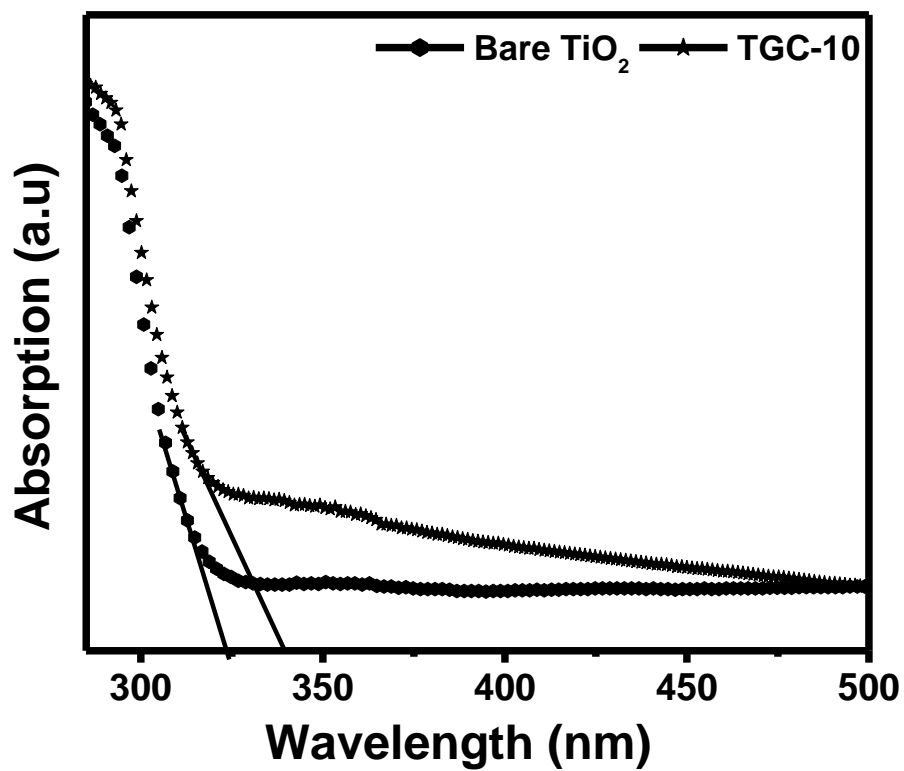

**Fig S2** The UV-Vis spectra showing the dye degradation for different weight percentages of graphene. (A) Bare TiO<sub>2</sub> (B) TGC-1 (C) TGC-5 (D) TGC-10

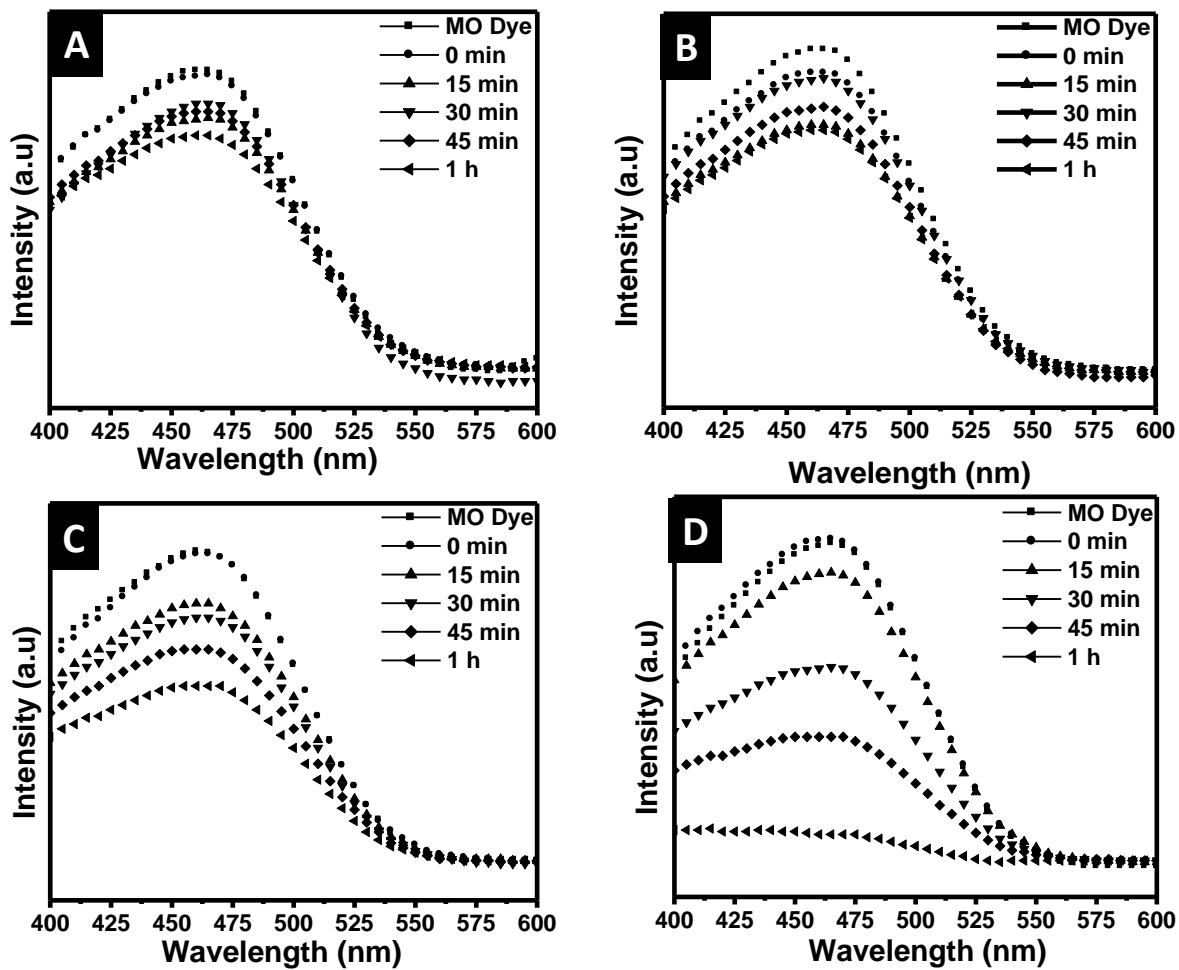

**Fig S3** The N<sub>2</sub> adsorption isotherm showing the surface area of the prepared TGC-10 sample.

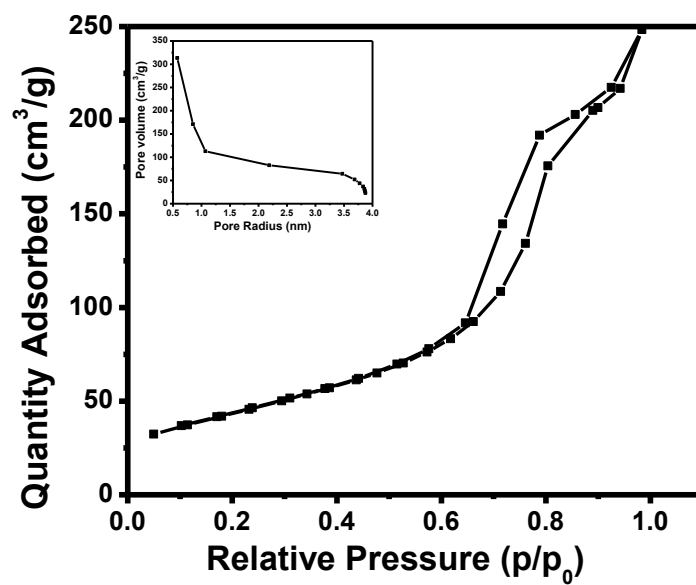

**Fig S4** The photoactivity plots for a) Graphene alone b) MO dye alone

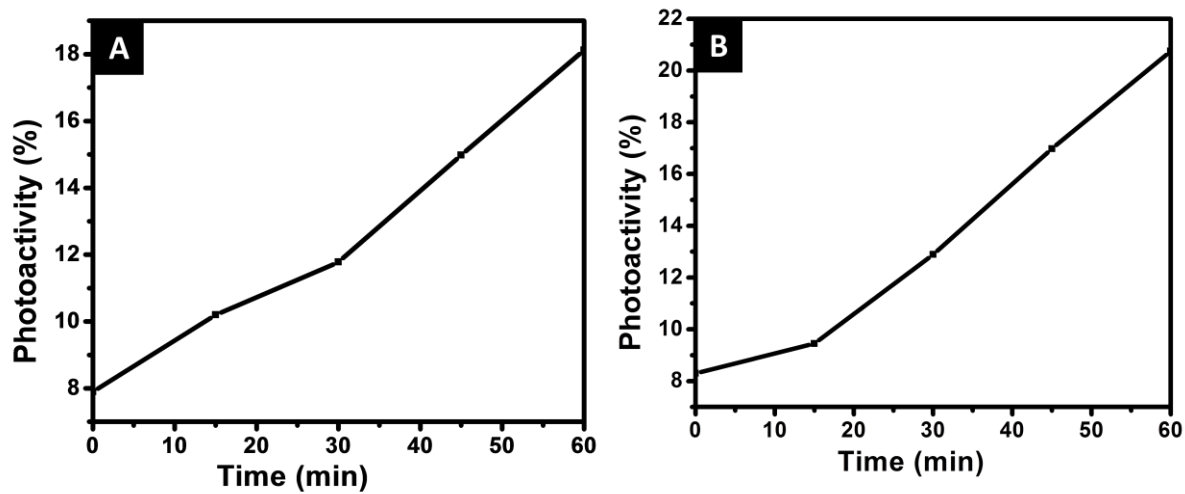

**Fig S5** XPS showing the increase in concentration of graphene a) Wide spectra of TiO<sub>2</sub>-G nanocomposite b) Carbon spectra showing the different concentrations of graphene.

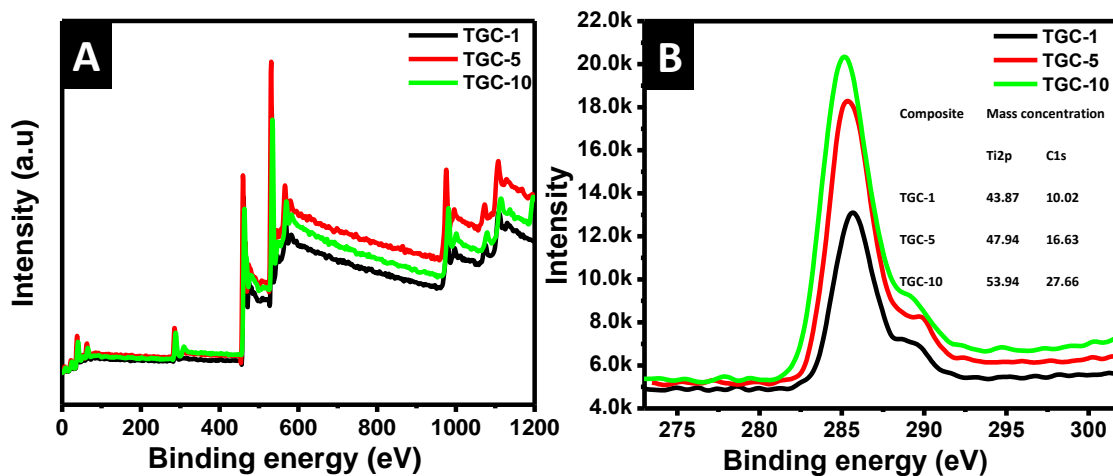

Table S1: Comparison of I-V characteristics of bare TiO<sub>2</sub> with TGCs 1, 0.7 and 0.5.

| <b>Sample</b>         | <b>I<sub>sc</sub> (mA/cm<sup>2</sup>)</b> | <b>V<sub>oc</sub> (V)</b> | <b>FF</b> | <b>η (%)</b> |
|-----------------------|-------------------------------------------|---------------------------|-----------|--------------|
| Bare TiO <sub>2</sub> | 4.29                                      | 0.47                      | 60.27     | 3.22         |
| TGC-0.5               | 6.05                                      | 0.47                      | 60.67     | 4.2          |
| TGC-0.7               | 6.13                                      | 0.46                      | 60.71     | 4.26         |
| TGC-1                 | 4.90                                      | 0.50                      | 61.22     | 4.05         |
